# 1 **Alternative architecture of the *E. coli* chemosensory array**

2 Alister Burt<sup>1#</sup>, C. Keith Cassidy<sup>2#</sup>, Phillip J. Stansfeld<sup>3</sup>, Irina Gutsche<sup>1\*</sup>

3 <sup>1</sup>Institut de Biologie Structurale, Univ. Grenoble Alpes, CEA, CNRS, IBS, 71 Avenue des martyrs, F-  
4 38044 Grenoble, France

5 <sup>2</sup>Department of Biochemistry, University of Oxford, South Parks Road, Oxford, OX1 3QU, UK.

6 <sup>3</sup>School of Life Sciences & Department of Chemistry, University of Warwick, Gibbet Hill Campus,  
7 CV4 7AL, UK

8 #: equal contribution

9 \*: Correspondence: [irina.gutsche@ibs.fr](mailto:irina.gutsche@ibs.fr)

## 10 **Abstract**

11 Chemotactic responses in motile bacteria are the result of sophisticated signal transduction by large,  
12 highly organized arrays of sensory proteins. Despite tremendous progress in the understanding of  
13 chemosensory array structure and function, a structural basis for the heightened sensitivity of  
14 networked chemoreceptors is not yet complete. Here we present cryo-electron tomography  
15 visualisations of native-state chemosensory arrays in *E. coli* minicells. Strikingly, these arrays exhibit  
16 a p2-symmetric array architecture that differs markedly from the p6-symmetric architecture  
17 previously described in *E. coli*. Based on this data, we propose molecular models of this alternative  
18 architecture and the canonical p6-symmetric assembly. We evaluate our observations and each  
19 model in the context of previously published data, assessing the functional implications of an  
20 alternative architecture and effects for future studies.

## 21 **Introduction**

22 Chemotactic responses in bacteria are mediated by large protein complexes known as  
23 chemosensory arrays, comprising thousands of copies of three primary components:  
24 transmembrane chemoreceptors (known as Methyl-accepting Chemotaxis Proteins or MCPs), the  
25 CheA histidine kinase, and the CheW coupling protein [1]. Environmental cues received by the  
26 periplasmic domains of receptors initiate sensory signals that regulate CheA autophosphorylation  
27 activity, thereby modulating a cascade of intracellular phosphorylation reactions that culminate in  
28 adaptable control of the locomotor machinery [2]. The highly organised clustering of chemosensory  
29 proteins integrates complex chemical signals and dramatically enhances response cooperativity,  
30 facilitating the exquisite sensitivity and behavioural adaptation characteristic of chemotactic  
31 responses [3]. As such, the supramolecular array structure has been the subject of intense study,  
32 both as a model system for signal transduction and due to the involvement of chemotaxis in crucial  
33 biological processes such as cell adhesion [4], biofilm formation [4]–[6], bacterial symbiosis with  
34 plants [7] and pathogen infection of plant and human hosts [6], [8]–[10].

35 First visualized by negative stain electron microscopy [11], the striking extended architecture  
36 of chemosensory arrays was immediately identified as an ideal target for cryo-electron microscopy  
37 [12] and cryo-electron tomography (cryo-ET) [13], [14]. Early cryo-ET analyses revealed that

38 chemoreceptors in a wide range of microbial species organise as receptor trimers of dimers (ToDs)  
39 that further pack into an extended hexagonal arrangement, which is considered to be their universal  
40 feature [15]–[17]. Subsequent cryo-ET studies, informed by crystal structures and molecular  
41 modelling, revealed the organisation of the baseplate region containing CheA and CheW in *E. coli*  
42 [18], [19], describing the existence of six-membered (A.P5/W)<sub>3</sub> rings involving the CheA P5  
43 regulatory domain (A.P5) and CheW that interlocked the cytoplasmic tips of receptor ToDs (Figure  
44 1). Within this organisation, pairs of ToDs linked by a CheA dimer and two CheW monomers form  
45 core-signalling units (CSUs), the minimal complex required for receptor-mediated CheA regulation  
46 [20], [21]. The CSU associates into a p6 symmetric lattice (i.e., displaying three-, and six-fold  
47 rotational symmetry in the centers of rings and two-fold rotational symmetry at the center of every  
48 CSU). In addition, (W)<sub>6</sub> rings composed exclusively of CheW, which result from the addition of a  
49 flanking CheW to each ToD of a CSU, are proposed to further interconnect the p6 lattice [19], [22].  
50 Thus the general picture of chemosensory arrays that has emerged is that of an extended, pseudo-  
51 p6-symmetric lattice of interconnected CSU building blocks assembled on the inner membrane.

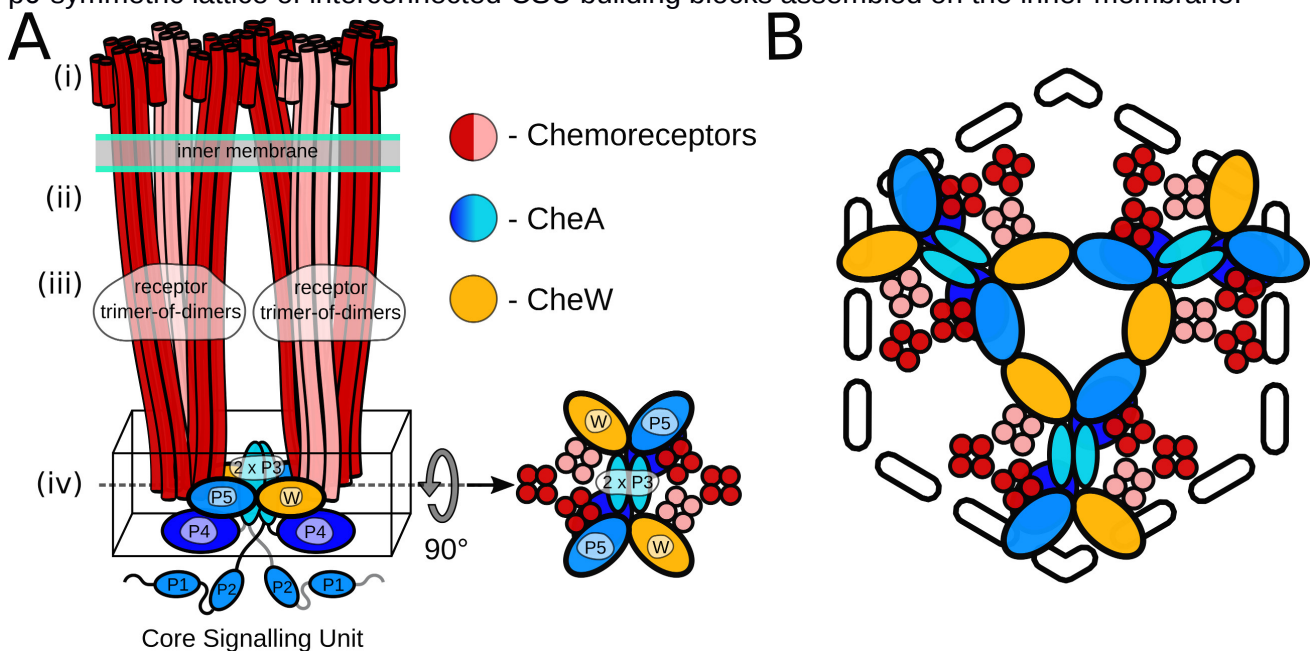

52 **Figure 1. Schematics of the core signalling unit and organisation of three CSUs into a hexagon.** A) Two  
53 ToDs interact with CheA and CheW to form a CSU shown from the side. In each ToD, two MCP dimers are  
54 shown in red and one in salmon for perspective. CheA is shown in shades of blue, and CheW in gold.  
55 Domains of CheA are labelled. The baseplate region is boxed and also shown from the top. B) Three CSUs  
56 assemble into a hexagon that gives rise to a (A.P5/W)<sub>3</sub> ring characteristic of the pseudo-p6-symmetric array  
57 architecture (see also Figure 3B for the extended array organisation showing the formation of (W)<sub>6</sub> rings).

58 Recent cryo-ET and molecular dynamics studies [23]–[25] have significantly increased the  
59 understanding of intra-CSU organisation and dynamics, culminating in the structure of a complete  
60 transmembrane CSU [26]. Although many questions regarding conformational rearrangements of  
61 the receptor and the kinase during signalling processes remain unanswered, even less is known  
62 about the ways in which signals are transmitted between CSUs. Generally speaking, analysis of  
63 array ultrastructure is complicated by limited long-range order in the structure, which is known to  
64 exhibit local deviations from an idealised symmetric architecture [24], [27], [28] and can be

65 assembled on membranes with varying degree of local curvature. Nevertheless, characterisation of  
66 the extended architecture of the chemosensory array is an essential step towards a molecular  
67 understanding of the cooperative allosteric interactions between array components that enable its  
68 unique capacity for efficient signal integration and amplification [2], [3]. Here we show that even the  
69 well-studied *E. coli* chemosensory array still holds surprises: the canonical pseudo-p6 organisation  
70 is not the only possible array architecture, nor does it adequately explain all existing experimental  
71 data. Instead, we highlight the existence of a pseudo-p2 organisation through cryo-ET observations  
72 of *E. coli* minicells. We propose molecular models of this alternate assembly as well as the  
73 canonical p6-symmetric organisation and compare their structural features in the light of current  
74 models of array structure and function.

## 75 **Results and discussion**

### 76 **A pseudo-p6 symmetric array architecture does not adequately describe all experimental** 77 **observations**

78 Different strategies have been employed to obtain images of chemosensory arrays with the  
79 aim of improving both their interpretability and the results of subsequent subtomogram averaging  
80 experiments. These include (i) overexpression or derepression of array and/or flagellar genes to  
81 increase array size and occurrence frequency [18], [19], [25], (ii) gentle cell lysis by a phage or an  
82 antibiotic to induce cytoplasmic leakage and thus reduce cell thickness [25], [29]–[31], (iii) *in vitro*  
83 reconstitution on lipid monolayers from purified cytoplasmic components to obtain a thin sample for  
84 high-resolution cryo-ET imaging [22], [24], (iv) genetic manipulation of *E. coli* to express a single  
85 type of MCP, possibly with specific adaptation states or other mutations, thereby increasing array  
86 homogeneity and mimicking discrete signalling states [24], [25], (v) exploration of the great variety of  
87 bacterial species[17], with often more complex and diverse chemotaxis systems, some of which are  
88 thinner than *E. coli* and (vi) the use of bacterial minicells that bud close to the cell poles, where  
89 arrays are located [19], [23]. Here we re-examine the ultrastructural context of our cryo-ET volumes  
90 of the *E. coli* WM4196 minicells which led to the complete *in situ* CSU structure [23] (EMPIAR-  
91 101364).

92 Side views of the *E. coli* chemosensory arrays have a characteristic brush-like appearance  
93 with MCP teeth protruding from the CheA/CheW baseplate located 30 nm under the inner  
94 membrane. The lines of MCPs extend all the way into the periplasm where, in the best cases, small  
95 globular densities corresponding to periplasmic domains are visible. Whereas such brush-like  
96 shapes can be directly seen in slices perpendicular to the direction of the electron beam in the  
97 tomographic reconstruction, and often even in projection images of the minicells, the higher-order  
98 organisation is easier to infer from top views, in which the array baseplate and its hallmark  
99 honeycomb pattern is oriented perpendicular to the optical axis. We leveraged cryo-CARE for  
100 Noise2Noise based denoising [32], a technique which both improves contrast and reduces the  
101 appearance of missing wedge artefacts in tomographic reconstructions, to better visualize the  
102 chemoreceptor arrays in our low signal-to-noise tomograms of the *E. coli* WM4196 minicells  
103 (EMPIAR-101364) [23]. Unexpectedly, whilst examining arrays in denoised tomograms in which  
104 receptors were aligned both perpendicular (Figure 2, A) and parallel (Figure 2, B) to the electron

105 beam during imaging, we noted that the arrays did not always appear to exhibit the expected  
106 pseudo-p6 symmetry. Instead, they contained a repeating diamond-shaped motif arranged in a p2-  
107 symmetric fashion. Given CSU stability, biochemical necessity and the CSU reconstruction derived  
108 from these data, we postulate that the diamond shaped motif corresponds to a CSU (Figure 2, C).

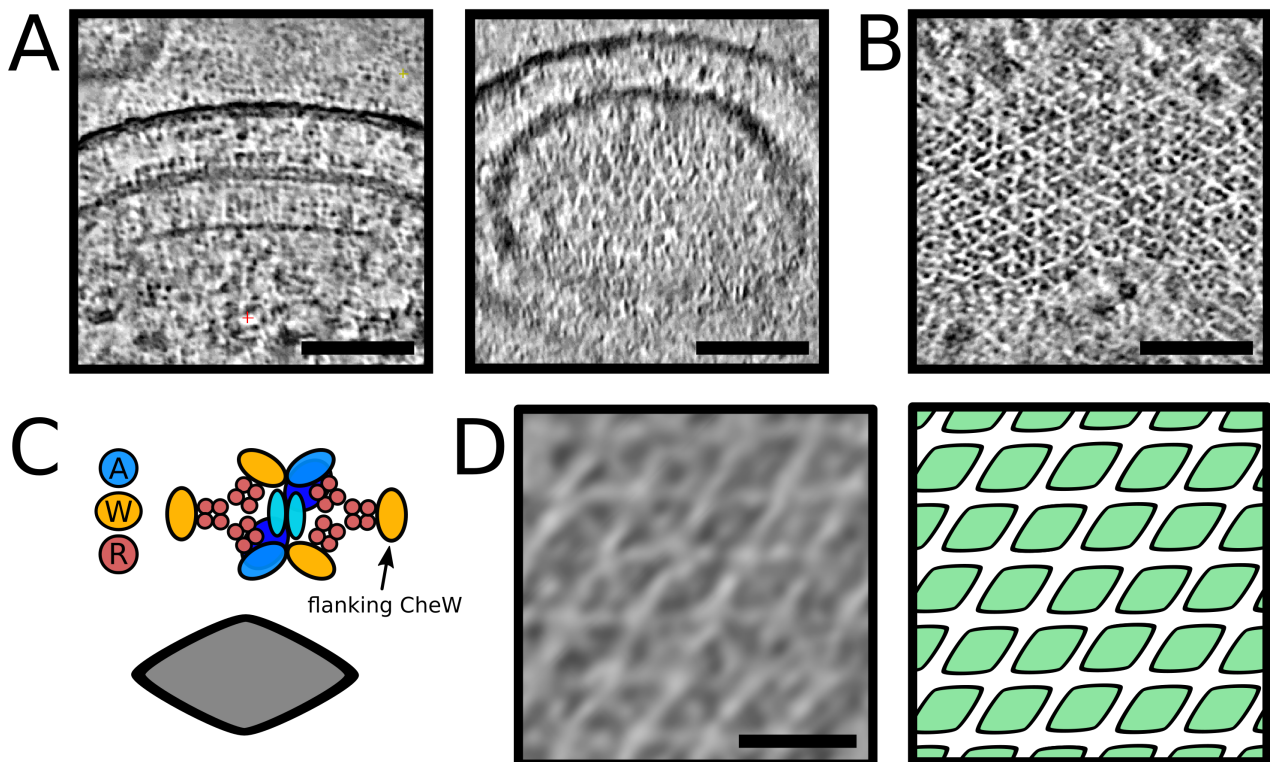

109 **Figure 2. Direct visualisation of a p2 organisation of core-signalling units in an *E. coli* minicell strain.**  
110 A) 10nm thick oblique slices through a denoised tomogram with a chemoreceptor array aligned with the optical  
111 axis of the microscope. Scale bar 25 nm. B) 10nm thick oblique slice through a denoised tomogram with a  
112 chemoreceptor array aligned perpendicular to the optical axis of the microscope. Scale bar 50 nm. C) A  
113 schematic of the CSU (top) showing the positions of CheA (blue), CheW (yellow) and receptor proteins (red). A  
114 simplified visualisation of the CSU is shown as a grey diamond (bottom). D) The chemoreceptor array from  
115 (B), depicted as a membranogram (left) following the curved surface of the array inside the cell, shows a p2  
116 symmetric array of CSUs (right). The protein density in A, B and D is black. Scale bar 20 nm.

117 Surprised by this observation, we decided to visualize the organisation with Membranorama, a tool  
118 which allows projection of tomographic density onto an arbitrary curved 3D surface instead of simple  
119 oblique slices [33]. Making use of the Dynamo software package [34], we performed template  
120 matching in the minicell tomograms using our reference array structure (EMD-10160). The resulting  
121 cross-correlation volume enabled accurate definition of a surface following the curvature of the  
122 array, onto which we projected local tomographic density. Dynamic exploration of the 3D membrane  
123 segmentations, shifting the region of density projected along the surface normal, shows a pseudo-  
124 p2-symmetric assembly of CSUs *in situ* (Figure 2, D). The resulting surface projections are best  
125 inspected directly in 3D (Supplementary Movie 1), enabling simultaneous examination of the entire  
126 *in situ* array organisation in one of our *E. coli* WM4196 minicell tomograms where the diamond-  
127 shaped motif is particularly conspicuous. Noteworthy, the lattice is directly visualized in the denoised

128 reconstruction of the a *E. coli* WM4196 minicell, without subtomogram averaging and associated  
129 symmetry imposition.

130 Strictly speaking one should refer to a “pseudo-symmetry” when describing a 3D  
131 organisation on a curved membrane surface and use the term symmetry only for 2D lattices.  
132 However, in the remainder of this paper we call the array architecture p2-symmetric or p6-symmetric  
133 for the sake of simplicity. It is critical to note that the WM4196 minicells analysed in this study  
134 possess arrays with normal stoichiometries of chemosensory components, and include a native  
135 distribution of MCPs that presumably have heterogeneous adaptation states. Thus, observed  
136 structural differences cannot be attributed to the genetic manipulation of the array components.

### 137 **Molecular models of p2- and p6-symmetric array architectures**

138 To account for and characterise the differences between the p2- and p6-symmetric lattices at  
139 the individual-protein level we constructed a molecular model of each array organisation (Figure 3,  
140 Figure 4, Supplementary Movie 2).

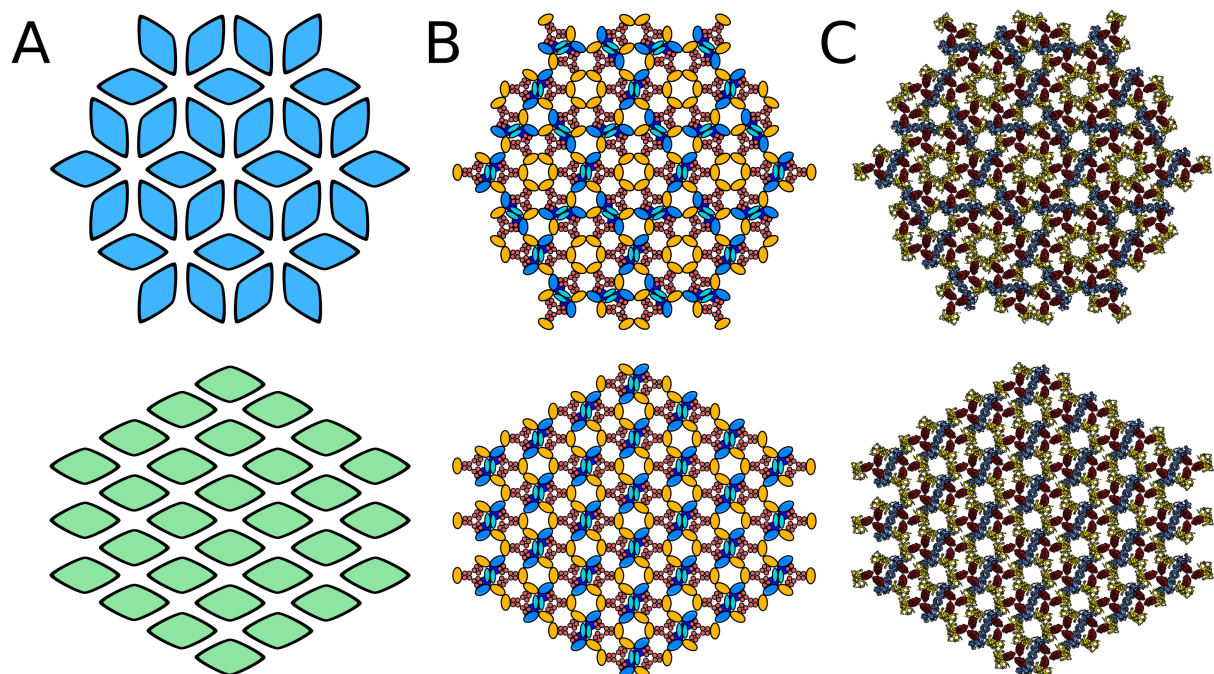

141 **Figure 3. Schematics and models of p6 and p2 chemosensory array architectures.** A) Simplified  
142 schematics of p6 (top, blue) and p2 (bottom, green) array architectures with each diamond representing a  
143 CSU. B) Schematics of p6 (top) and p2 (bottom) array architectures in which CheA, CheW and receptor  
144 proteins are depicted and coloured blue, green and red respectively. C) The baseplate region of all-atom  
145 models of the p6 (top) and p2 (bottom) array architectures.

146 As described in the Methods section, we first constructed a model the full-length *E. coli* CSU, which  
147 was arranged via tiling with a p6 or p2 symmetry and using a lattice constant of 126 Å [23]. As  
148 expected, both models reproduced the universal hexagonal arrangement of receptor ToDs. In  
149 addition, at the level of the kinase baseplate, the p6 model contained both the anticipated (A.P5/W)<sub>3</sub>  
150 rings and empty sites for (W)<sub>6</sub> rings. In contrast, the p2 assembly generated only a single type of  
151 semi-formed ring whereby two CSUs provide a (A.P5/W) pair and two opposing CSUs present a

152 bare receptor dimer. Addition of flanking CheW monomers to each CSU filled empty  $(W)_6$  rings in the  
 153 p6 array model and gave rise to complete two-fold symmetric  $(A.P5/W/W)_2$  rings in the p2 array  
 154 model. Thus while the flanking CheW molecules are involved in coupling neighbouring CSUs  
 155 through rings in both lattices, their exact role is symmetry-dependent. In the p6 model, they serve to  
 156 reinforce an existing lattice created by the  $(A.P5/W)_3$  rings formed by three CSUs, whereas in the p2  
 157 model they are essential to the formation of an intact p2 lattice in which four CSUs with flanking  
 158 CheW molecules are required. Another striking difference between the two architectures concerns  
 159 the intermolecular organisation of CheA (Figure 4, Supplementary Movie 2). In the p6 organisation,  
 160 CheA molecules are arranged in a trimeric fashion with one monomer of each CheA dimer  
 161 contributing a P5 domain to a  $(A.P5/W)_3$  ring in the center of the trimer, and the other monomer  
 162 contributing a P5 domain to one of the three surrounding  $(A.P5/W)_3$  rings. These trimeric CheA  
 163 arrangements are themselves organised in an interlocking hexameric fashion around central  $(W)_6$   
 164 rings. In the p2 organisation, however, CheA dimers form parallel stripes such that each monomer of  
 165 the CheA dimer contributes its P5 domains to an opposite  $(A.P5/W/W)_2$  ring, resulting in chains of  
 166 interlocked rings. Interestingly, this difference in CheA arrangement alters considerably both the  
 167 intermolecular distance and the relative orientation of neighbouring CheA molecules (Supplementary  
 168 Figure 1), the potential consequences of which are discussed further below.

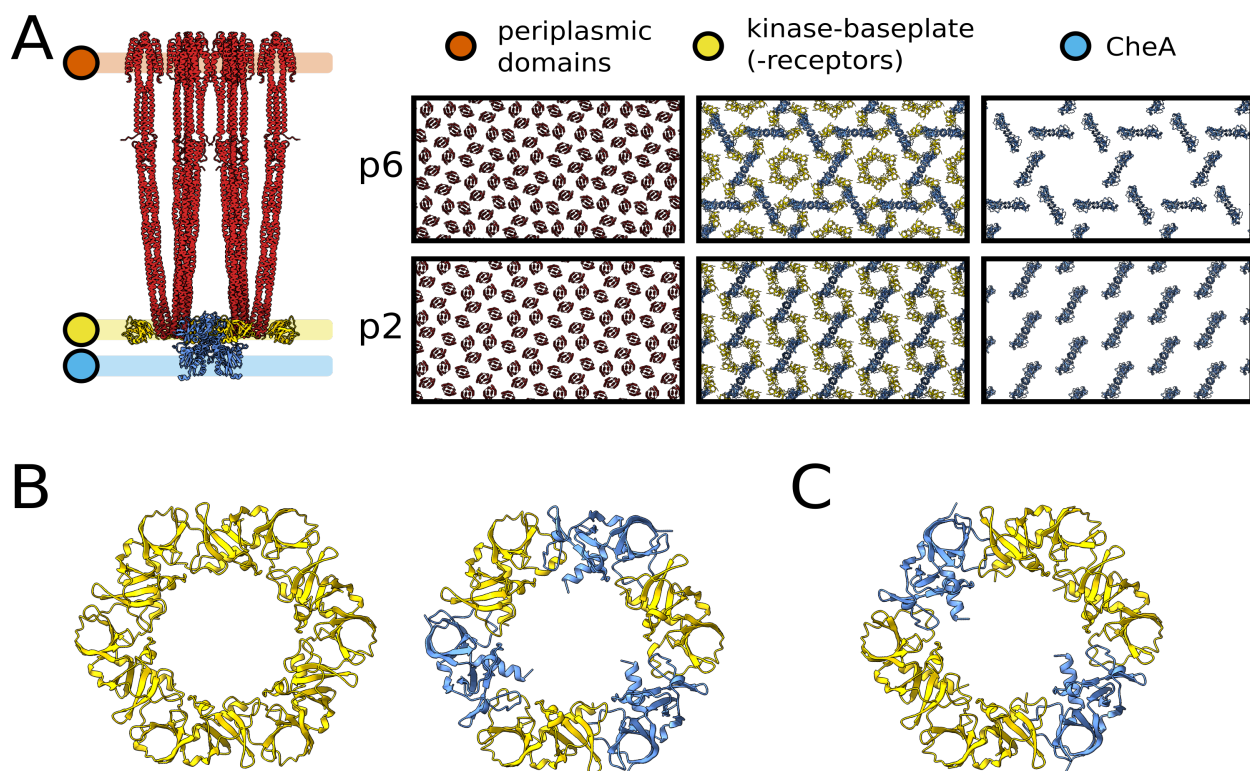

169 **Figure 4. Structural features of p6 and p2 chemosensory array architectures.** A) All-atom model of the  
 170 CSU (left) including flanking CheW molecules. Regions corresponding to the periplasmic domains of receptor  
 171 proteins, kinase baseplate and CheA.P4 are demarcated in orange, yellow and blue respectively. The  
 172 corresponding regions in both the p6 and p2 array architectures are presented to the right, showing the near-  
 173 identical receptor organisation and structural differences in the baseplate region. B) The  $(W)_6$  and  $(A.P5/W)_3$   
 174 rings of CheA and CheW present in the p6 array architecture. C) The  $(A.P5/W/W)_2$  ring of CheA and CheW  
 175 present in the p2 array architecture.

176 The proposed p2 array architecture does not require any deviation from our current understanding  
177 of CSU structure and preserves critical intra-CSU signalling interfaces between receptor dimers and  
178 either CheA.P5 or CheW. In addition, despite the above-mentioned differences in overall baseplate  
179 organisation, the same three types of ring interfaces are exclusively present within the baseplates of  
180 both lattices. These include the previously characterized interface I, involving subdomain 1 of  
181 CheA.P5 and subdomain 2 of CheW [35], interface II, involving the subdomain 2 of CheA.P5 and  
182 subdomain 1 of CheW [36] as well as an interface involving subdomain 1 and subdomain 2 of two  
183 CheW monomers, which we term interface III (Figure 4, B, Figure 5). Interestingly, assuming fully-  
184 interconnected p2 and p6 lattices (i.e., with all flanking CheW sites occupied), the relative  
185 abundances of ring interfaces are identical within each lattice, namely 2x interface I, 4x interface II,  
186 and 4x interface III (Figure 5). The differences in ring structure are primarily manifest as a spatial  
187 redistribution of the baseplate ring interfaces. Whilst in the p6 lattice, interfaces I and II alternate  
188 within the (A.P5/W)<sub>3</sub> rings and interface III is present exclusively within the (W)<sub>6</sub> rings, in the p2  
189 lattice, all three interface types are present within each (A.P5/W/W)<sub>2</sub> ring and each type is adjacent  
190 to the other two (Figure 5). Notably, the extended p2 and p6 molecular models yield no indication  
191 that interfaces I, II, or III should be subject to different structural constraints within the two lattices.  
192 For example, interface II is expected to possess interactions between roughly the same subset of  
193 interfacial residues in both the p6 and p2 lattices despite utilizing a core CheW in the former and a  
194 flanking CheW in the latter.

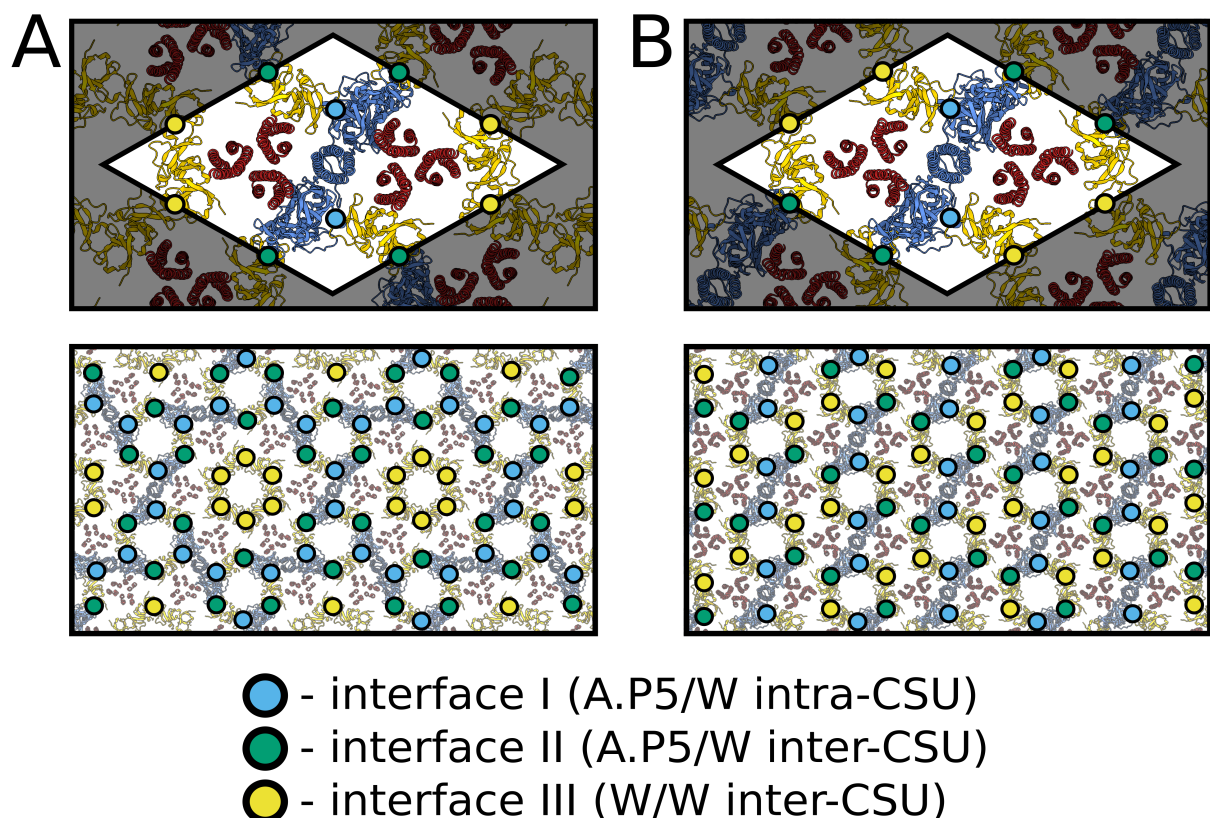

195 **Figure 5. Assembly interfaces of p6 and p2 chemosensory array architectures.** The positions of  
196 assembly interfaces I (A.P5/W intra-CSU), II (A.P5/W inter-CSU) and III (W/W inter-CSU) are depicted in blue,  
197 green and yellow respectively for (A) the p6 and (B) p2 array architectures. For each architecture the spatial  
198 distribution is depicted around one CSU (top) and a larger assembly of CSUs (bottom).

## 199 **Structure based-analysis of functional implications of p2 architecture**

200         Given that the foremost distinguishing factor between the p2 architecture reported here and  
201 the canonical p6 lattice is the inter-CSU organisation, one might expect that signalling properties  
202 arising due to the interactions between CSUs to be affected. Following the elucidation of the p6  
203 architecture in *E. coli* [18], [19], structural lesions designed to affect the allosteric coupling between  
204 CSUs through disruption of interface II were shown to have dramatic effects on the cooperativity and  
205 sensitivity of the chemotactic response, suggesting that these properties were directly linked to the  
206 degree of interconnectedness between CSUs [36], [37]. This notion has been further advanced by a  
207 recent study investigating the role of the (W)<sub>6</sub> rings within the p6 architecture, showing that the  
208 cooperativity of the signalling response increases with the number and completeness of (W)<sub>6</sub> rings,  
209 which vary widely depending on array assembly conditions (Piñas et al., personal communication).  
210 Thus, given that the baseplate connectivity within the p6 lattice depends on the degree of (W)<sub>6</sub> ring  
211 occupancy, one might expect the p2 architecture, which necessarily exhibits a fully-interconnected  
212 baseplate, to possess a higher degree of inherent cooperativity. In addition, an analysis of the  
213 number of interfaces required to get from each receptor in within a given CSU to the nearest CheA  
214 in both organisations suggests that signals can be more readily transmitted between neighboring  
215 components via baseplate rings in the p2 architecture. Indeed, all three receptors in a given ToD are  
216 within two interfaces from the nearest CheA.P5 in the p2 organisation, whereas only two receptors  
217 are within this distance in the p6 architecture and the third receptor is bound to a ring that does not  
218 contain CheA at all (Figure 5). Over longer ranges however, such analysis is complicated by the fact  
219 that specific baseplate interfaces and/or ring types could differ in flexibility and dynamics owing to  
220 their composition, which might change the efficacy of signal transmission between CSUs. An  
221 interesting corollary of these observations is that signalling within the CSU may also be altered  
222 despite its conserved structure. Specifically, there is evidence of functional asymmetries between  
223 receptors within a ToD depending on the particular baseplate component to which they are attached  
224 [25], [38]. Thus the noted alterations in the structural context of each baseplate interface might  
225 cause such receptor symmetry breaking to manifest differently within the two lattices despite the  
226 conserved hexagonal arrangement of receptors (Supplementary Figure 2).

227         Finally, differences in both the intermolecular distances and relative orientations of  
228 neighbouring CheA dimers may also have non-trivial effects on signalling and cooperativity. The P1  
229 and P2 domains of CheA, which mediate the transfer of phosphoryl groups between CheA.P4 and  
230 the response regulator CheY, reside below the baseplate layer and are connected to each other and  
231 CheA.P3 by long, unstructured linkers. While, as far as we are aware, the possibility of inter-dimer  
232 CheA communication within chemosensory arrays has neither been proposed nor ruled out  
233 elsewhere, our models suggest that these linkers could allow interactions between the P1 domain of  
234 a given CheA and the P4 domain of a neighbouring CheA (Supplementary Figure 1). Such long-  
235 range interactions may, therefore, be a general feature of cooperative CheA signalling, which would  
236 likely be altered by the above-mentioned change in CheA organisation.



## 237 **Implications of the observation of p2-symmetric chemosensory arrays in *E. coli***

238 The bulk of cryo-ET imaging of chemosensory arrays in diverse biological contexts  
239 demonstrates a clear preference for the formation of a p6 symmetric architecture in *E. coli*. The  
240 question thus emerges: what are the molecular origins of the p2 symmetric architecture seen in this  
241 study? While to the best of our knowledge a p2 symmetric architecture has not yet been reported for  
242 the *E. coli* chemosensory array, a recent publication by Muok *et al.* describes an unusual  
243 chemosensory array organisation in the spirochete *Treponema denticola* [39]. Similar to the p2  
244 lattice described in this study, the atypical *T. denticola* array exhibits a linear CheA arrangement,  
245 including rings involving interactions between a classical CheW and a spirochete-specific CheW  
246 variant that are analogous to the (A.P5/W/W)<sub>2</sub> rings seen in our model. Due to the orientation of the  
247 linear CheA strands, which always appear to run parallel to the cell axis, and because of the very  
248 high curvature of these cells perpendicular to the cell axis, the authors propose that the array  
249 organisation seen in *T. denticola* evolved specifically to accommodate the spirochetes' high  
250 curvature. This notion is further supported by the presence of unique structural features in the CheW  
251 variant and CheA dimerisation domain, which are suggested to be critical for maintaining the  
252 structural integrity and function of these highly-curved arrays. Thus, considering the *T. denticola*  
253 array organisation, it is tempting to ascribe our observation of a p2 organisation in *E. coli* minicells to  
254 the increased curvature relative to standard *E. coli* cells. It should be noted however that the *E. coli*  
255 minicells studied here are considerably less curved than the *T. denticola* cells. Assuming an initially  
256 spherical minicell geometry (i.e., before plunge freezing), we estimate the average radius of  
257 curvature of the inner membrane to be 153 nm (Supplementary Figure 3) as compared to 28 nm  
258 reported for the *T. denticola* cells. Moreover, given the well-documented stability of the  
259 chemosensory array both *in vivo* and *in vitro* [40]–[43], it is likely that the p2 organisation is present  
260 as such in certain WM4196 mother cells, which are necessarily less curved, prior to minicell  
261 budding. Intriguingly, re-examination of previously published data [24] in light of these new  
262 observations appears to indicate the presence of p2 architectures even in arrays of purified  
263 cytoplasmic components reconstituted on lipid monolayers with very low curvature (Supplementary  
264 Figure 4).

265 One of the means of regulation of the array assembly into a p2 or p6-symmetric architecture  
266 may also originate from the assembly dynamics. The importance of the relative expression levels of  
267 array components for the formation of extended, well-ordered array patches *in vitro* and *in situ* is  
268 well documented [17], [22], [27]. We suggest therefore that the p2 architecture may arise via an  
269 alternative assembly pathway, involving alterations in spatio-temporal regulation of component  
270 expression. Although a detailed array assembly mechanism remains elusive, the current working  
271 model in *E. coli* suggests that receptors first form ToDs that aggregate near the cellular poles, where  
272 they combine with CheA and CheW to form complete CSUs, which associate further into  
273 intermediate extended structures. While the canonical p6 architecture may accommodate either  
274 CheW-only or empty rings at the six-fold symmetry axes of this arrangement, the p2 organisation  
275 presented here exhibits only identical nodes of (A.P5/W/W)<sub>2</sub> rings whilst respecting the same overall  
276 stoichiometry of array components as the p6 array that has all CheW-only rings filled. Considering

278 that the flanking CheW molecules, which are not necessary for formation of a p6 lattice, take on a  
279 critical role in the p2 architecture, we propose an assembly pathway in which increased occupancy  
280 of these flanking positions on CSUs increases the probability of forming p2-symmetric patches.  
281 Presumably, the p2 pathway becomes more important upon increase of the local concentration of  
282 CheW during the early stages of array formation. The preponderance of the p6 architecture may  
283 thus simply result from a more favourable assembly pathway. Interestingly, in many bacteria the  
284 CheW:CheA ratio is much higher than in *E. coli* [17]. An intriguing possibility is that the p6 and p2-  
285 symmetric architectures may compete during the formation of the extended array, similar to what  
286 has been observed in some bacterial S-layers [44]. Within such a phase-competition picture, it may  
287 be that intermediate-curvature settings tip the balance in favour of a p2 organisation, which  
288 becomes a structural necessity in the face of extreme curvatures, such as in *T. denticola* as  
289 suggested by Muok *et al.* Additional work will be required to identify how specific environmental  
290 factors contribute to array assembly and to unravel how their interplay affects array function.

291 As a final note, the observation of p2 patches elsewhere would imply that it may be present  
292 more broadly within previously analysed datasets, but has gone unnoticed. A possible reason for  
293 this is the use of symmetrisation during subtomogram averaging experiments. Indeed, large portions  
294 of the overall structure remain similar upon 2-, 3- and 6-fold symmetrisation (Supplementary Figure  
295 5), a property which has historically been used to improve reconstructions from small numbers of  
296 subtomograms. In an effort to enable further analysis of baseplate asymmetries, we have deposited  
297 our raw cryo-ET data for WM4196 minicells in the EMDB (EMPIAR-10364) and would like to urge  
298 others to make available their raw data for previously published work.

299 In summary, we show that the p6 architecture does not adequately explain all images of *E.*  
300 *coli* minicells with classical chemotaxis proteins and propose an alternative which respects the  
301 observed p2 symmetry as well as the current understanding of CSU structure and the previously  
302 characterised critical signalling interfaces. Whilst the physiological reasons for the existence of two  
303 distinct types of array architecture with possibly differing signalling properties are as yet unknown,  
304 the discovery of alternative assemblies and their probable coexistence within collected datasets  
305 should undoubtedly stimulate further investigation and influence the way biochemical and structural  
306 data from chemotactic systems are analysed moving forward.

## 307 **Methods**

308 The genetic characterisation of the *E. coli* WM4196 minicell-producing strain, as well as its  
309 growth, minicell purification, cryo-ET grid preparation and data acquisition are described in our  
310 previous manuscript [26]. The acquired raw cryo-ET data available in the EMDB (EMPIAR-10364)  
311 was reexamined in the present work.

## 312 **Tilt Series Alignment and Tomographic Reconstruction**

313 Multi-frame micrographs for each tilt image in EMPIAR-10364 were subject to whole frame  
314 alignment and image stacks were generated for each tilt-series in Warp. Tilt series were aligned  
315 automatically using the tilt-series alignment workflows available in Dynamo 1.1.478. Final bead  
316 positions from Dynamo were used to produce alignment parameters for the tilt-series with the IMOD

317 program tiltalign, solving only for shifts and a constant tilt-axis rotation for the tilt-series with the  
318 robust fitting method. Tomograms were reconstructed based on these alignments in Warp.

### 319 **Denoising Tomograms**

320 Even and odd half-tomograms were generated with an isotropic voxel spacing of 5Å using  
321 Warp [45], from even and odd frames of multi-frame micrographs respectively. A Noise2Noise  
322 [46] based denoising convolutional neural network was trained using cryo-CARE [32]. The cryo-  
323 CARE model was trained with a batch size of 16, a learning rate of 0.0004 for 200 epochs with 75  
324 training steps per epoch. The trained network was then applied to the corresponding tomogram  
325 reconstructed from the full dataset to produce a denoised tomogram.

### 326 **Chemosensory Array Baseplate Segmentation and Visualisation**

327 Template matching of EMD-10160 in reconstructed tomograms with a voxel spacing of 17.96  
328 Å was performed in the Dynamo software package [34], using both in-plane and out-of-plane  
329 sampling of 12 degrees. A set of cross-correlation peaks corresponding to the CSUs in the  
330 chemosensory array with a regular organisation were observed at a distance of 25 nm from intense  
331 cross-correlation response seen for the inner-membrane. A smooth, curved surface was modelled  
332 following this set of peaks as a membrane model in Dynamo. The mesh was exported, imposing  
333 consistent normal orientations, then imported with the corresponding tomogram (voxel spacing  
334 17.96, reconstructed using the SIRT-like filter in IMOD with 15 iterations) into Membranorama for  
335 visualisation. Given that the EMPIAR-10364 dataset contains six tilt series only, this procedure  
336 cannot be used for statistical evaluation on the relative prevalence of the p2 and p6 lattices but  
337 greatly facilitates visual examination of the array architecture.

### 338 **Molecular Modeling**

339 A model of the *E. coli* transmembrane CSU was constructed by extending a recent sub-  
340 nanometer resolution model of the baseplate region (PDB ID: 6S1K) [24] using the full-length *E. coli*  
341 Tsr ToD model derived in our previous manuscript [23]. Flanking CheW molecules were added to  
342 both bare receptors in the CSU model using the core-CheW/receptor binding mode observed in  
343 PDB ID 6S1K. Extended models for both the p2 and p6 symmetries were constructed by tiling their  
344 respective unit cells along the appropriate lattice vectors. In the case of the p2 lattice, the unit cell is  
345 the CSU itself, while in the p6 lattice, the unit cell consists of three CSUs arranged within a  
346 parallelepiped as previously described [22]. A lattice constant of 126 Å was used in both cases as it  
347 produced an intact baseplate and is consistent with our previous measurements [23]. Modelling of  
348 the CheA.P1 and CheA.P2 domains was based on PDB ID 2LP4 [47] with missing residues in the  
349 P2-P3 linker filled in using Modeller v9.23 [48]. General modelling procedures and figure renderings  
350 were conducted using using VMD v1.9.4 [49].

### 351 **Data availability**

352 The raw data from which tomograms were calculated, as well as reconstructed tomograms, are  
353 available on EMPIAR with accession code EMPIAR-10364. The Cryo-ET map derived from these tilt

354 series and published in [26] is available from the EMDB with accession code EMD-10160.  
355 Coordinates for both the p2- and p6-symmetric *E. coli* array models are available for download at  
356 DOI: 10.5281/zenodo.4302473.

### 357 **Reporting Summary**

358 Further information on research design is available in the Nature Research Reporting Summary  
359 linked to this article.

### 360 **Acknowledgements**

361 This work has received funding from a European Union's Horizon 2020 research and innovation  
362 programme under grant agreement No 647784 to IG. This work was also supported by the U.K.  
363 Biotechnology and Biological Sciences Research Council grant BB/S003339/1 to CKC and PJS.  
364 We acknowledge Diamond Light Source for access and support of the cryo-EM facilities at the UK's  
365 national Electron Bio-imaging Centre (eBIC), funded by the Wellcome Trust, MRC and BBRSC.  
366 Cryo-ET data acquisition has been supported by iNEXT, grant number 653706 (PID:2626 to IG),  
367 funded by the EU Horizon 2020 programme. We are particularly grateful to Daniel Castaño-Diez for  
368 help and discussions on image processing and for development of Dynamo.

### 369 **Competing Interests**

370 The authors declare no competing interests

### 371 **References**

- 372 [1] J. J. Falke and K. N. Piasta, "Architecture and signal transduction mechanism of the bacterial  
373 chemosensory array: progress, controversies, and challenges.," *Curr. Opin. Struct. Biol.*, vol.  
374 29, pp. 85–94, Dec. 2014.
- 375 [2] J. S. Parkinson, G. L. Hazelbauer, and J. J. Falke, "Signaling and sensory adaptation in  
376 *Escherichia coli* chemoreceptors: 2015 update," *Trends Microbiol.*, vol. 23, no. 5, pp. 257–  
377 266, 2015.
- 378 [3] G. L. Hazelbauer, J. J. Falke, and J. S. Parkinson, "Bacterial chemoreceptors: high-  
379 performance signaling in networked arrays.," *Trends Biochem. Sci.*, vol. 33, no. 1, pp. 9–19,  
380 Jan. 2008.
- 381 [4] L. Laganenka, R. Colin, and V. Sourjik, "Chemotaxis towards autoinducer 2 mediates  
382 autoaggregation in *Escherichia coli*," *Nat. Commun.*, vol. 7, no. 1, p. 12984, Dec. 2016.
- 383 [5] G. Alexandre, "Chemotaxis Control of Transient Cell Aggregation," *J. Bacteriol.*, vol. 197, no.  
384 20, pp. 3230–3237, Oct. 2015.
- 385 [6] K. He and C. E. Bauer, "Chemosensory signaling systems that control bacterial survival,"  
386 *Trends Microbiol.*, vol. 22, no. 7, pp. 389–398, Jul. 2014.
- 387 [7] B. E. Scharf, M. F. Hynes, and G. M. Alexandre, "Chemotaxis signaling systems in model  
388 beneficial plant–bacteria associations," *Plant Mol. Biol.*, vol. 90, no. 6, pp. 549–559, Apr.  
389 2016.

- 390 [8] Y. Gotoh, Y. Eguchi, T. Watanabe, S. Okamoto, A. Doi, and R. Utsumi, “Two-component  
391 signal transduction as potential drug targets in pathogenic bacteria,” *Curr. Opin. Microbiol.*,  
392 vol. 13, no. 2, pp. 232–239, Apr. 2010.
- 393 [9] K. S. Johnson and K. M. Ottemann, “Colonization, localization, and inflammation: the roles of  
394 *H. pylori* chemotaxis in vivo,” *Curr. Opin. Microbiol.*, vol. 41, pp. 51–57, Feb. 2018.
- 395 [10] M. A. Matilla and T. Krell, “The effect of bacterial chemotaxis on host infection and  
396 pathogenicity,” *FEMS Microbiol. Rev.*, vol. 42, no. 1, 2018.
- 397 [11] R. M. Weis, T. Hirai, A. Chalah, M. Kessel, P. J. Peters, and S. Subramaniam, “Electron  
398 microscopic analysis of membrane assemblies formed by the bacterial chemotaxis receptor  
399 Tsr,” *J. Bacteriol.*, vol. 185, no. 12, pp. 3636–3643, 2003.
- 400 [12] P. Zhang *et al.*, “Direct visualization of receptor arrays in frozen-hydrated sections and plunge-  
401 frozen specimens of *E. coli* engineered to overproduce the chemotaxis receptor Tsr,” *J.*  
402 *Microsc.*, vol. 216, no. 1, pp. 76–83, Oct. 2004.
- 403 [13] A. Briegel, “Strukturuntersuchungen an Prokaryonten mit Kryo-Elektronentomographie,” *ech.*  
404 Univ. Munchen, Munich, 2005.
- 405 [14] P. Zhang, C. M. Khursigara, L. M. Hartnell, and S. Subramaniam, “Direct visualization of  
406 *Escherichia coli* chemotaxis receptor arrays using cryo-electron microscopy,” *Proc. Natl.*  
407 *Acad. Sci. U. S. A.*, vol. 104, no. 10, pp. 3777–3781, 2007.
- 408 [15] A. Briegel *et al.*, “Universal architecture of bacterial chemoreceptor arrays,” *Proc. Natl. Acad.*  
409 *Sci. U. S. A.*, vol. 106, no. 40, pp. 17181–17186, 2009.
- 410 [16] A. Briegel, D. R. Ortega, A. N. Huang, C. M. Oikonomou, R. P. Gunsalus, and G. J. Jensen,  
411 “Structural conservation of chemotaxis machinery across Archaea and Bacteria,” *Environ.*  
412 *Microbiol. Rep.*, vol. 7, no. 3, pp. 414–9, Jun. 2015.
- 413 [17] W. Yang and A. Briegel, “Diversity of Bacterial Chemosensory Arrays,” *Trends Microbiol.*,  
414 vol. 28, no. 1, pp. 68–80, 2020.
- 415 [18] A. Briegel, X. Li, A. M. Bilwes, K. T. Hughes, G. J. Jensen, and B. R. Crane, “Bacterial  
416 chemoreceptor arrays are hexagonally packed trimers of receptor dimers networked by rings  
417 of kinase and coupling proteins,” *Proc. Natl. Acad. Sci.*, vol. 109, no. 10, pp. 3766–3771,  
418 2012.
- 419 [19] J. Liu, B. Hu, D. R. Morado, S. Jani, M. D. Manson, and W. Margolin, “Molecular architecture  
420 of chemoreceptor arrays revealed by cryoelectron tomography of *Escherichia coli* minicells,”  
421 *Proc. Natl. Acad. Sci.*, vol. 109, no. 23, pp. E1481–E1488, 2012.
- 422 [20] M. Li and G. L. Hazelbauer, “Core unit of chemotaxis signaling complexes,” *Proc. Natl.*  
423 *Acad. Sci.*, vol. 108, no. 23, pp. 9390–9395, Jun. 2011.
- 424 [21] M. Li, C. M. Khursigara, S. Subramaniam, and G. L. Hazelbauer, “Chemotaxis kinase CheA is  
425 activated by three neighbouring chemoreceptor dimers as effectively as by receptor clusters,”  
426 *Mol. Microbiol.*, vol. 79, no. 3, pp. 677–85, Feb. 2011.

- 427 [22] C. K. Cassidy *et al.*, “CryoEM and computer simulations reveal a novel kinase conformational  
428 switch in bacterial chemotaxis signaling,” *Elife*, vol. 4, no. NOVEMBER2015, pp. 1–20,  
429 2015.
- 430 [23] A. Burt *et al.*, “Complete structure of the chemosensory array core signalling unit in an E. coli  
431 minicell strain,” *Nat. Commun.*, vol. 11, no. 1, p. 743, 2020.
- 432 [24] C. K. Cassidy *et al.*, “Structure and dynamics of the E. coli chemotaxis core signaling complex  
433 by cryo-electron tomography and molecular simulations,” *Commun. Biol.*, vol. 3, no. 1, p. 24,  
434 Dec. 2020.
- 435 [25] W. Yang *et al.*, “In Situ Conformational Changes of the Escherichia coli Serine Chemoreceptor  
436 in Different Signaling States.,” *MBio*, vol. 10, no. 4, Jul. 2019.
- 437 [26] A. Burt *et al.*, “Complete structure of the chemosensory array core signalling unit in an E. coli  
438 minicell strain,” *Nat. Commun.*, vol. 11, no. 1, p. 743, Dec. 2020.
- 439 [27] A. Briegel *et al.*, “Structure of bacterial cytoplasmic chemoreceptor arrays and implications  
440 for chemotactic signaling,” *Elife*, vol. 2014, no. 3, pp. 1–16, 2014.
- 441 [28] C. M. Khursigara, X. Wu, and S. Subramaniam, “Chemoreceptors in *Caulobacter crescentus*:  
442 Trimers of receptor dimers in a partially ordered hexagonally packed array,” *J. Bacteriol.*, vol.  
443 190, no. 20, pp. 6805–6810, 2008.
- 444 [29] A. Briegel *et al.*, “New insights into bacterial chemoreceptor array structure and assembly  
445 from electron cryotomography.,” *Biochemistry*, vol. 53, no. 10, pp. 1575–85, Mar. 2014.
- 446 [30] A. Briegel, P. Ames, J. C. Gumbart, C. M. Oikonomou, J. S. Parkinson, and G. J. Jensen, “The  
447 mobility of two kinase domains in the escherichia coli chemoreceptor array varies with  
448 signalling state,” *Mol. Microbiol.*, vol. 89, no. 5, pp. 831–841, 2013.
- 449 [31] X. Fu, B. A. Himes, D. Ke, W. J. Rice, J. Ning, and P. Zhang, “Controlled bacterial lysis for  
450 electron tomography of native cell membranes,” *Structure*, vol. 22, no. 12, pp. 1875–1882,  
451 2014.
- 452 [32] T.-O. Buchholz, M. Jordan, G. Pigino, and F. Jug, “Cryo-CARE: Content-Aware Image  
453 Restoration for Cryo-Transmission Electron Microscopy Data,” Oct. 2018.
- 454 [33] W. Wietrzynski *et al.*, “Charting the native architecture of *Chlamydomonas* thylakoid  
455 membranes with single-molecule precision,” *Elife*, vol. 9, Apr. 2020.
- 456 [34] D. Castaño-Díez, M. Kudryashev, M. Arbeit, and H. Stahlberg, “Dynamo: a flexible, user-  
457 friendly development tool for subtomogram averaging of cryo-EM data in high-performance  
458 computing environments.,” *J. Struct. Biol.*, vol. 178, no. 2, pp. 139–51, May 2012.
- 459 [35] A. M. Natale, J. L. Duplantis, K. N. Piasta, and J. J. Falke, “Structure, Function, and On–Off  
460 Switching of a Core Unit Contact between CheA Kinase and CheW Adaptor Protein in the  
461 Bacterial Chemosensory Array: A Disulfide Mapping and Mutagenesis Study,” *Biochemistry*,  
462 vol. 52, no. 44, pp. 7753–7765, Nov. 2013.

- 463 [36] G. E. Piñas, V. Frank, A. Vaknin, and J. S. Parkinson, “The source of high signal cooperativity  
464 in bacterial chemosensory arrays.,” *Proc. Natl. Acad. Sci. U. S. A.*, vol. 113, no. 12, pp. 3335–  
465 40, Mar. 2016.
- 466 [37] V. Frank, G. E. Piñas, H. Cohen, J. S. Parkinson, and A. Vaknin, “Networked chemoreceptors  
467 benefit bacterial chemotaxis performance,” *MBio*, vol. 7, no. 6, pp. 1–9, 2016.
- 468 [38] M. Li and G. L. Hazelbauer, “Selective allosteric coupling in core chemotaxis signaling  
469 complexes,” *Proc. Natl. Acad. Sci.*, vol. 111, no. 45, pp. 15940–15945, Nov. 2014.
- 470 [39] A. R. Muok *et al.*, “Atypical chemoreceptor arrays accommodate high membrane curvature.,”  
471 *Nat. Commun.*, vol. 11, no. 1, p. 5763, 2020.
- 472 [40] A. H. Erbse and J. J. Falke, “The core signaling proteins of bacterial chemotaxis assemble to  
473 form an ultrastable complex.,” *Biochemistry*, vol. 48, no. 29, pp. 6975–87, Jul. 2009.
- 474 [41] K. N. Piasta and J. J. Falke, “Increasing and decreasing the ultrastability of bacterial  
475 chemotaxis core signaling complexes by modifying protein-protein contacts.,” *Biochemistry*,  
476 vol. 53, no. 35, pp. 5592–600, Sep. 2014.
- 477 [42] S. Schulmeister, M. Ruttorf, S. Thiem, D. Kentner, D. Lebiez, and V. Sourjik, “Protein  
478 exchange dynamics at chemoreceptor clusters in *Escherichia coli*.,” *Proc. Natl. Acad. Sci. U.*  
479 *S. A.*, vol. 105, no. 17, pp. 6403–8, Apr. 2008.
- 480 [43] P. F. Slivka and J. J. Falke, “Isolated bacterial chemosensory array possesses quasi- and  
481 ultrastable components: functional links between array stability, cooperativity, and order.,”  
482 *Biochemistry*, vol. 51, no. 51, pp. 10218–28, Dec. 2012.
- 483 [44] U. B. Sleytr and T. J. Beveridge, “Bacterial S-layers.,” *Trends Microbiol.*, vol. 7, no. 6, pp.  
484 253–60, Jun. 1999.
- 485 [45] D. Tegunov and P. Cramer, “Real-time cryo-electron microscopy data preprocessing with  
486 Warp.,” *Nat. Methods*, vol. 16, no. 11, pp. 1146–1152, 2019.
- 487 [46] J. Lehtinen *et al.*, “Noise2Noise: Learning Image Restoration without Clean Data,” Mar. 2018.
- 488 [47] G. Mo, H. Zhou, T. Kawamura, and F. W. Dahlquist, “Solution structure of a complex of the  
489 histidine autokinase CheA with its substrate CheY.,” *Biochemistry*, vol. 51, no. 18, pp. 3786–  
490 98, May 2012.
- 491 [48] B. Webb and A. Sali, “Comparative Protein Structure Modeling Using MODELLER.,” *Curr.*  
492 *Protoc. Bioinforma.*, vol. 54, pp. 5.6.1-5.6.37, 2016.
- 493 [49] W. Humphrey, A. Dalke, and K. Schulten, “VMD: visual molecular dynamics.,” *J. Mol.*  
494 *Graph.*, vol. 14, no. 1, pp. 33–8, 27–8, Feb. 1996.
- 495

## 496 **Author Contributions**

497 AB analysed cryo-ET data with input from IG. CKC and AB constructed the model of the p2  
498 architecture in discussion with IG and PJS. AB and CKC prepared the figures and movies. IG  
499 supervised the study. IG, AB and CKC wrote the manuscript. Correspondence and request for  
500 materials should be addressed to IG.
