# Supplementary material for: Alternative architecture of the E. coli chemosensory array
Source: bioRxiv or medRxiv preprint supplement (doi:10.1101/2021.02.05.429929), 2021-02-05
Supplement: Supplementary file [file media-1.pdf]

1 **Supplementary Information**

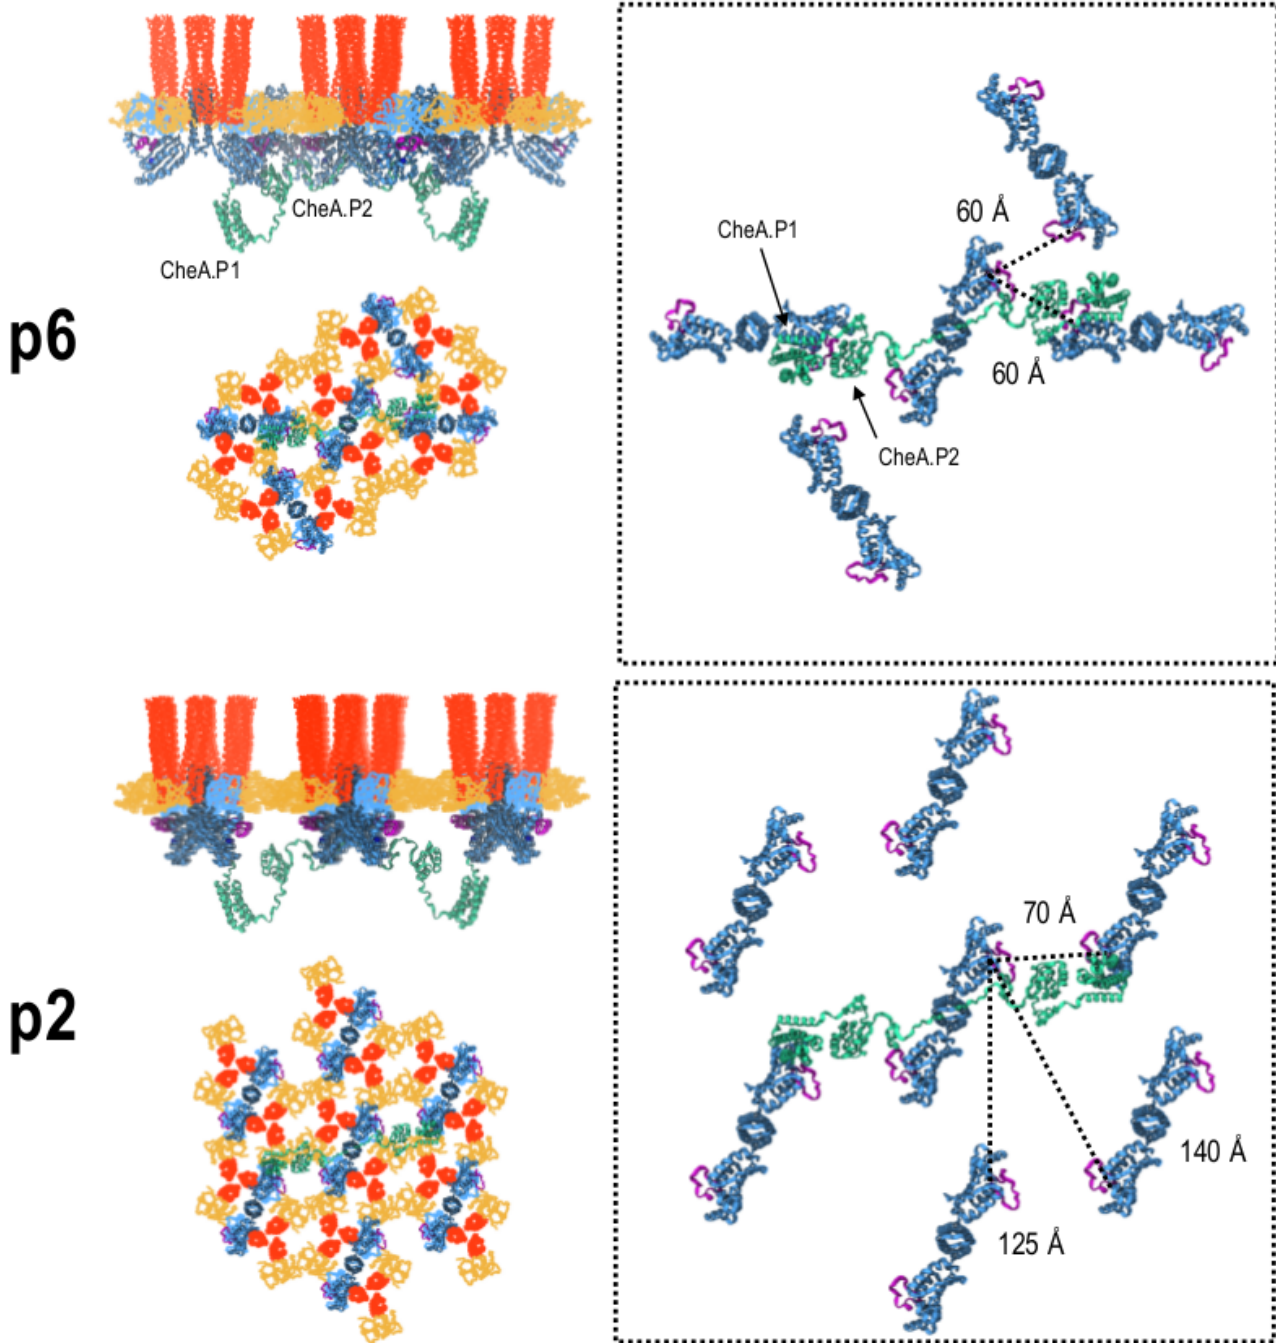

2 **Supplementary Figure 1. The intermolecular distance and the relative orientation of**  
3 **neighbouring CheA molecules are different between the p6 and p2 array architectures.** Side  
4 and bottom views of the p6- and p2-symmetric array models with the CheA.P1 and CheA.P2  
5 domains (shown in green) modelled for a centralised CheA dimer. Receptors, CheA.P3.P4.P5, and  
6 CheW are coloured as in other figures. Boxed regions show the rough distances between an ATP-  
7 binding site from one of the central CheA monomers and ATP-binding sites on neighbouring CheAs  
8 that may be accessible in a trans-fashion by the CheA.P1 and CheA.P2 domains from the opposing  
9 central CheA monomer. The ATP lid (residues 455-475) of each CheA monomer is shown in purple.  
10 Receptors, CheW, and CheA.P5 are not shown for clarity.

11

p6

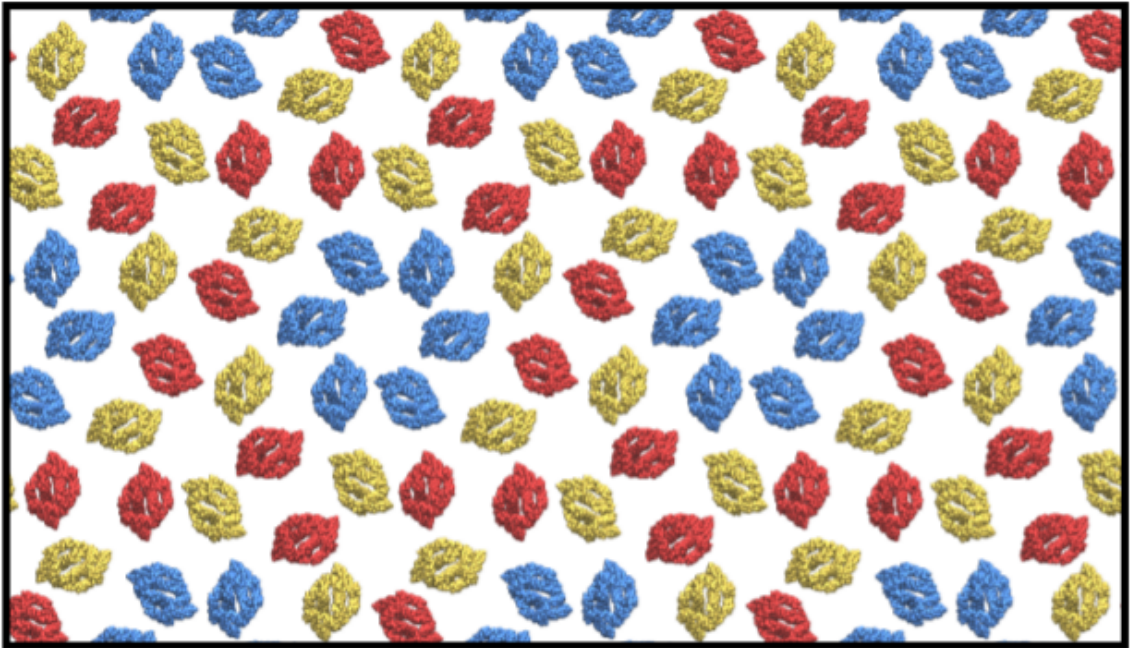

p2

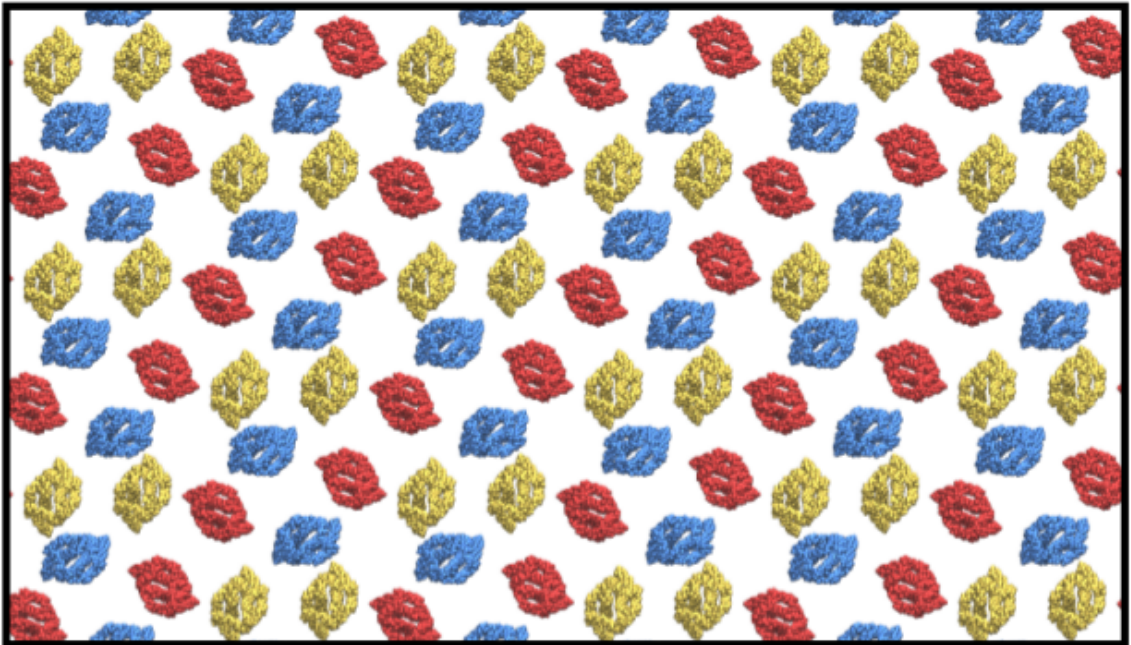

13 **Supplementary Figure 2. The hexagonal arrangement of receptors is conserved between the**  
14 **p6 and p2 array architectures.** Top view of the p6- and p2-symmetric array models with receptor  
15 periplasmic domains coloured according to baseplate partner. Receptors bound to CheA.P5 are  
16 shown in red, core CheW in yellow, and flanking CheW in blue.

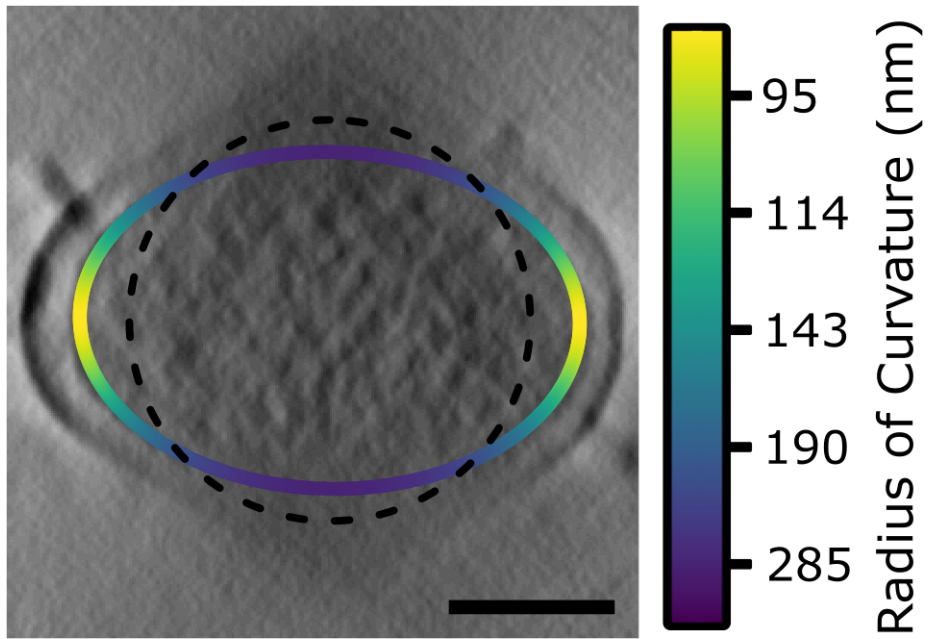

17 **Supplementary Figure 3. Estimation of the average radius of curvature of the inner**  
18 **membrane of the WM4196 minicells in cryo-ET.** An XZ projection through the region of a  
19 tomogram containing a p2-symmetric array architecture. Local estimates for radii of curvature are  
20 indicated on an overlaid ellipse. A circle with curvature equal to the mean curvature of the ellipse  
21 plotted as a dashed line.  
22  
23

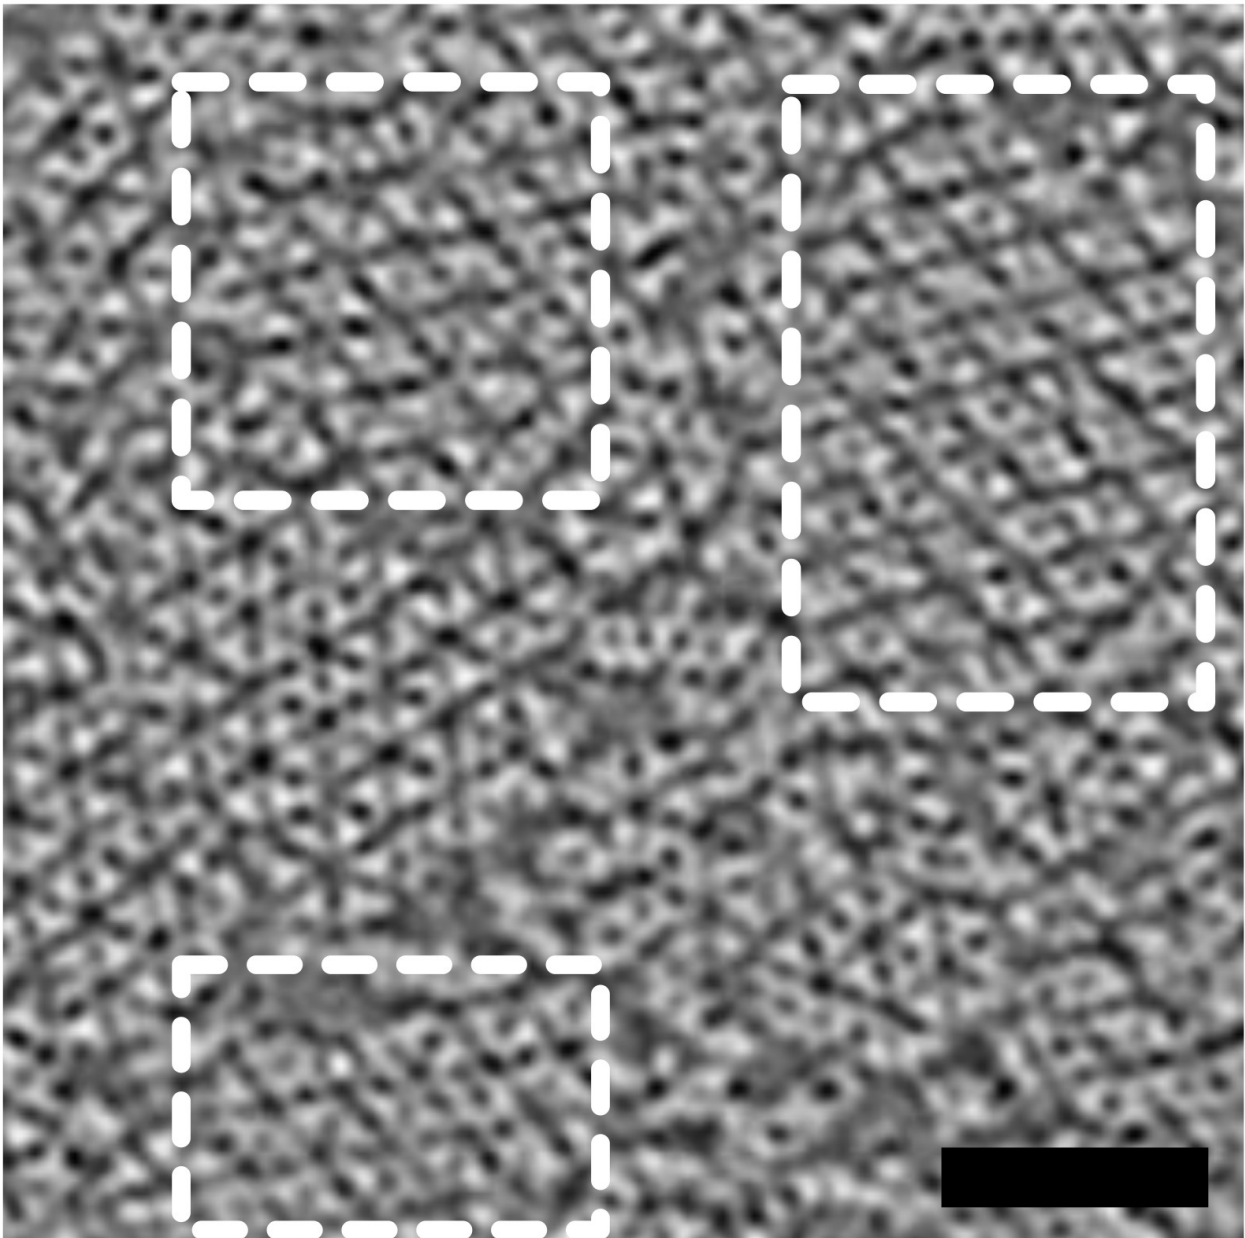

25 **Supplementary Figure 4. An image region of an *in vitro* reconstituted chemosensory array**  
26 **with very low curvature taken from Cassidy et al. 2020. Parts on the image which appear to**  
27 **display a p2 array architecture are highlighted in dashed rectangles. Scale 50 nm.**  
28  
29

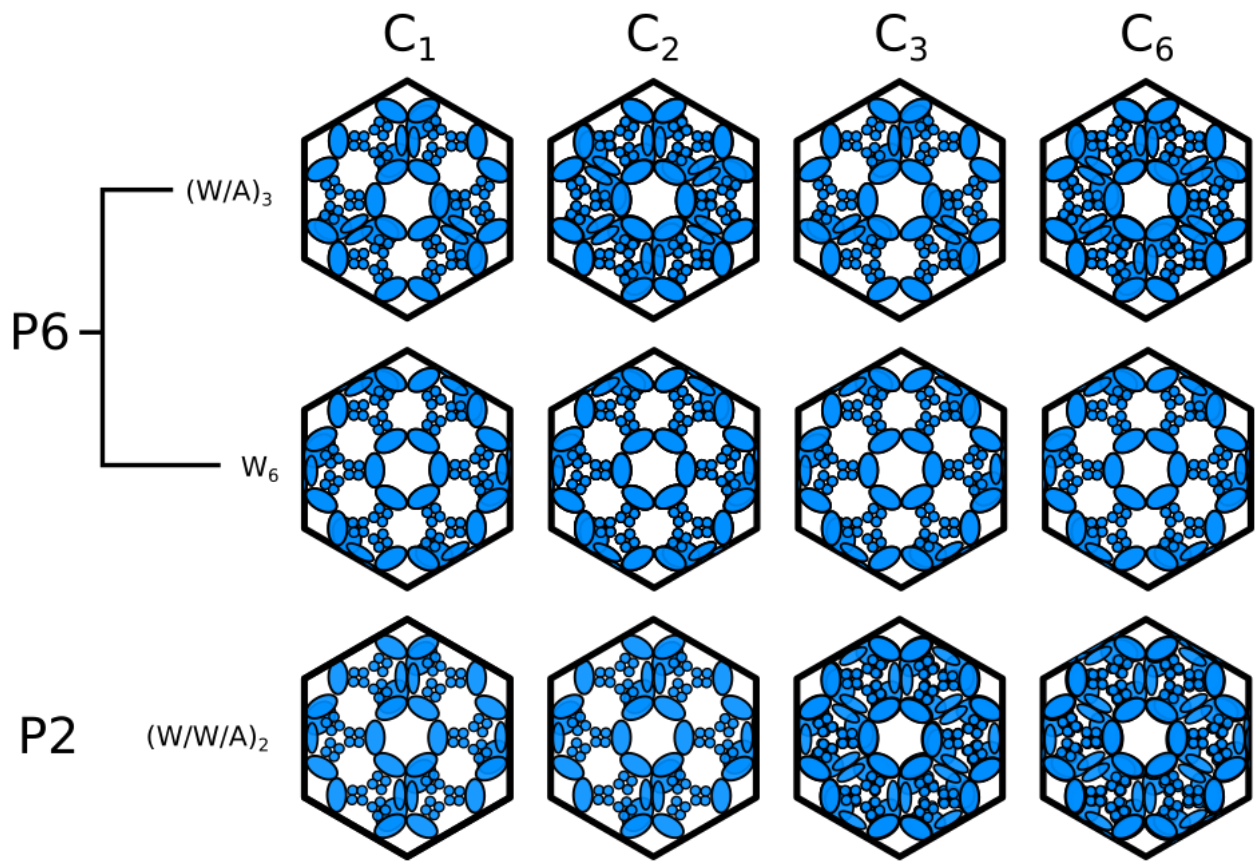

30 **Supplementary Figure 5.** The effects of applying different symmetries to reconstructions  
 31 centered at the center of six receptor trimers-of-dimers in both p6 and p2 architectures.

32 **Movie 1. Dynamic exploration of a tomogram on a curved surface in the region of the**  
33 **chemosensory array.** Density from a WM4196 tomogram is projected onto a curved surface in the  
34 tomogram at the level of the chemosensory array inside the minicell. The region of density projected  
35 is shifted along the normal to the surface of each triangle in the mesh to explore the tomogram at  
36 different levels of the array architecture.

37

38 **Movie 2. A comparison of models of p6 and p2 chemosensory array architectures.** The  
39 models of both p6 and p2 symmetric array architectures are visualised as slices at different levels of  
40 the structure to highlight similarities and differences at various positions in the extended  
41 architecture. The arrow on the model of the chemosensory array on the left hand side indicates the  
42 position of the slice through the model of the extended architectures displayed on the right hand  
43 side.
